# Supplementary material
Source: Frontiers journal article supplement (https://www.frontiersin.org/articles/185486)
Supplement: Image_2.PDF [file Image_2.PDF]

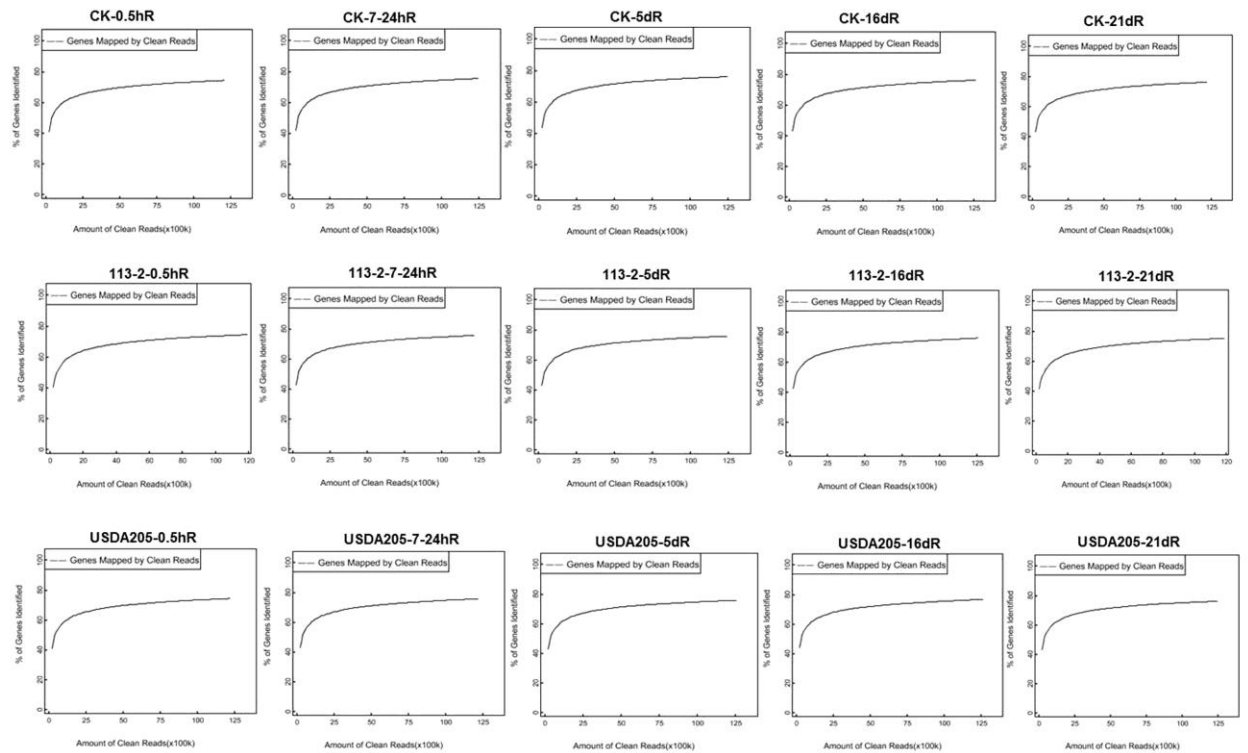

**Supplemental Figure S2 Representative results of sequencing saturation analysis for soybean roots samples at five time points after inoculation with rhizobium strains 113-2 or USDA205.**
